# Supplementary material for: Strain localization and dynamic recrystallization in the ice–air aggregate: a numerical study
Source: Copernicus journal article supplement (doi:10.5194/tc-10-3071-2016), 2016-12-21
Supplement: Supplementary file 1 [file tc-10-3071-2016-supplement.zip]

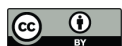

## *Supplement of*

# **Strain localization and dynamic recrystallization in the ice–air aggregate: a numerical study**

**Florian Steinbach et al.**

*Correspondence to:* Florian Steinbach ([florian.steinbach@uni-tuebingen.de](mailto:florian.steinbach@uni-tuebingen.de))

- [tc-10-3071-2016-supplement-title-page.pdf](#)
- [Supplement\\_FigureS1.png](#)
- [Supplement\\_FigureS2.png](#)

The copyright of individual parts of the supplement might differ from the CC-BY 3.0 licence.
